# Supplementary material
Source: PubMed Central journal article supplement (PMC3378149)
Supplement: emmm0001-0315-SD1.pdf [file emmm0001-0315-SD1.pdf]

Supplementary  
Figure 1

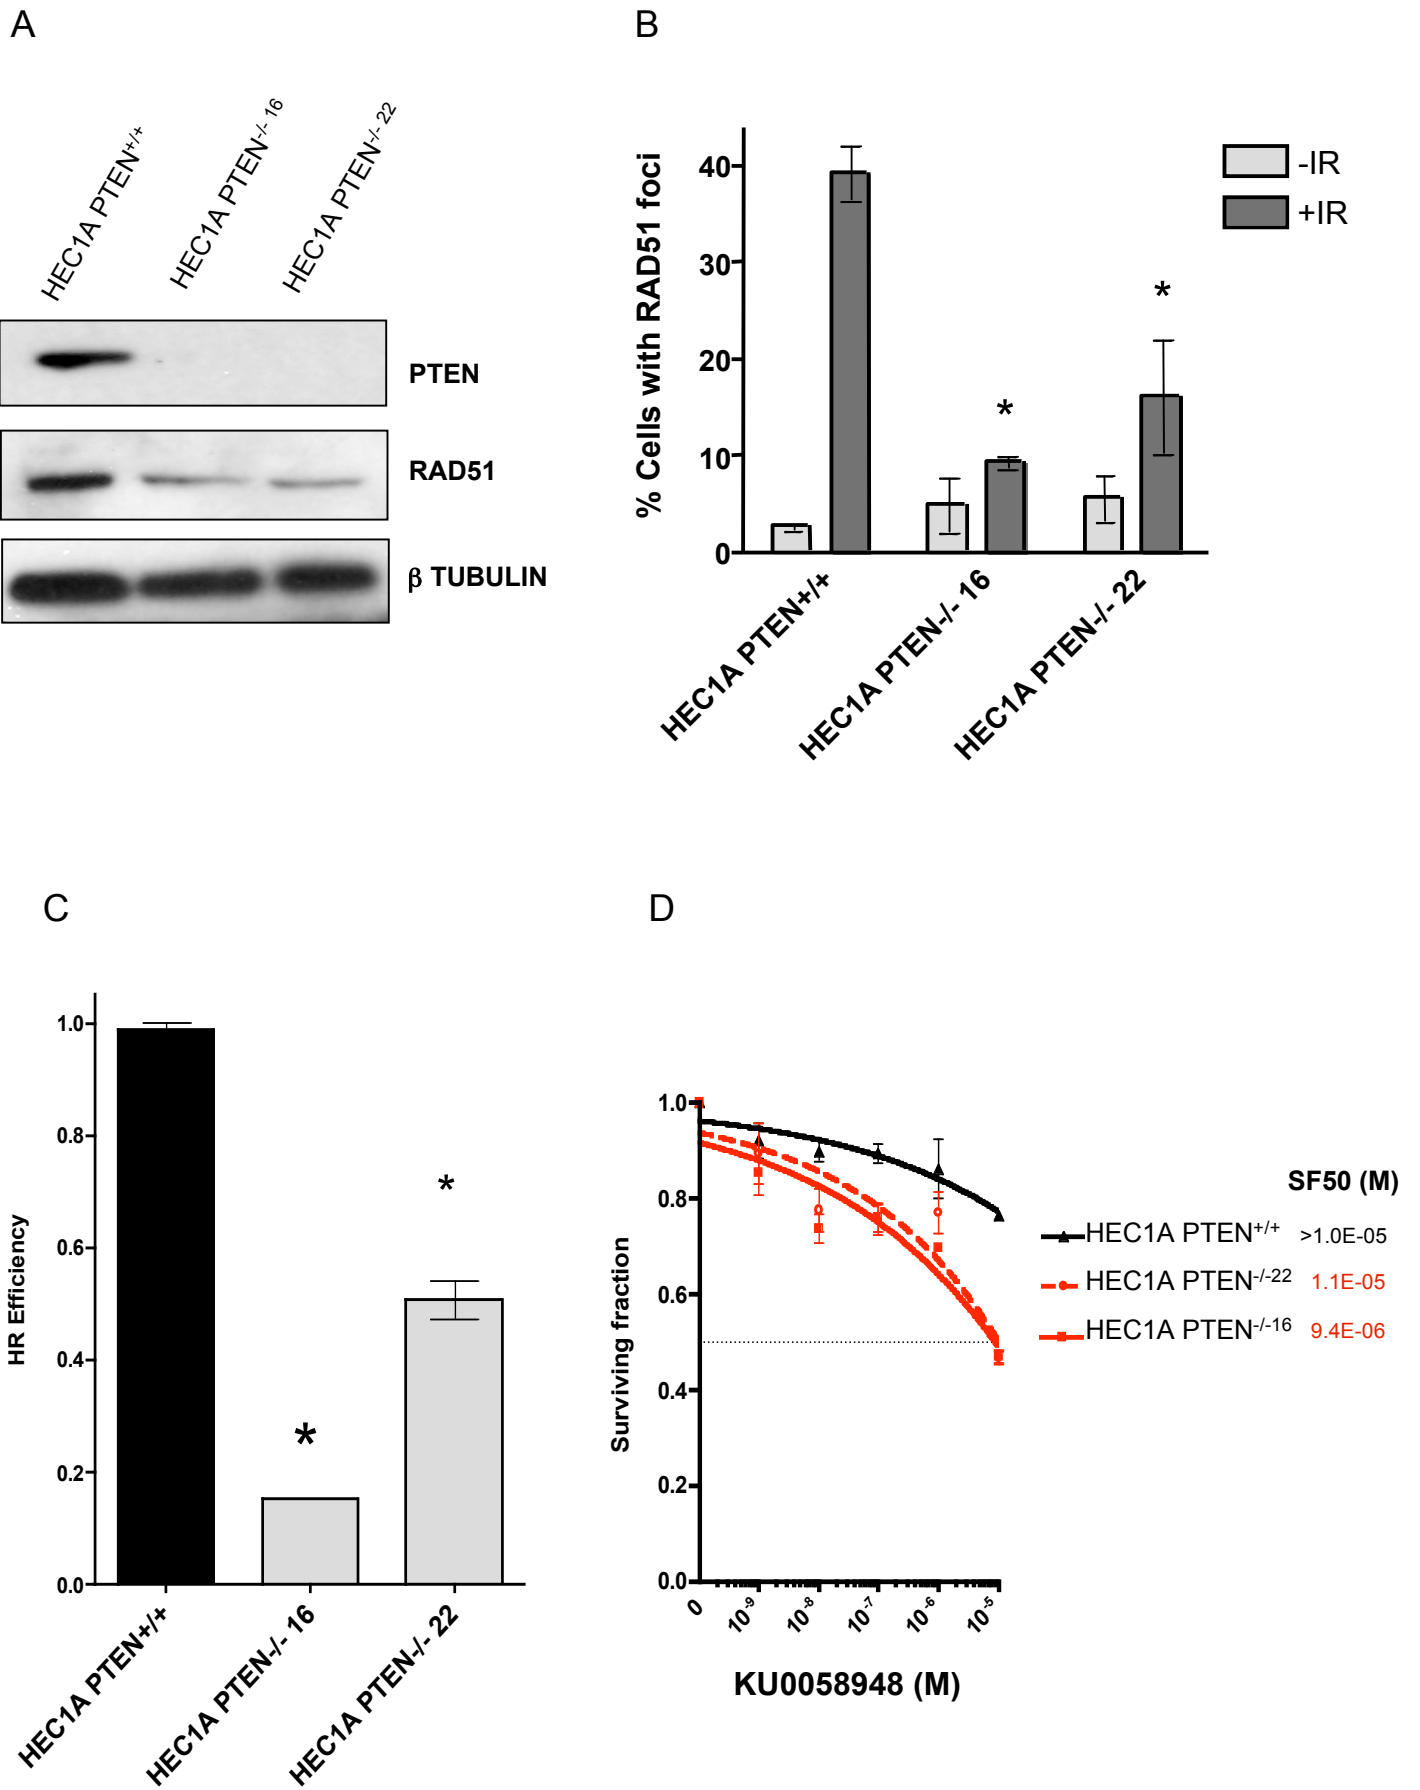

Supplementary  
Figure 2

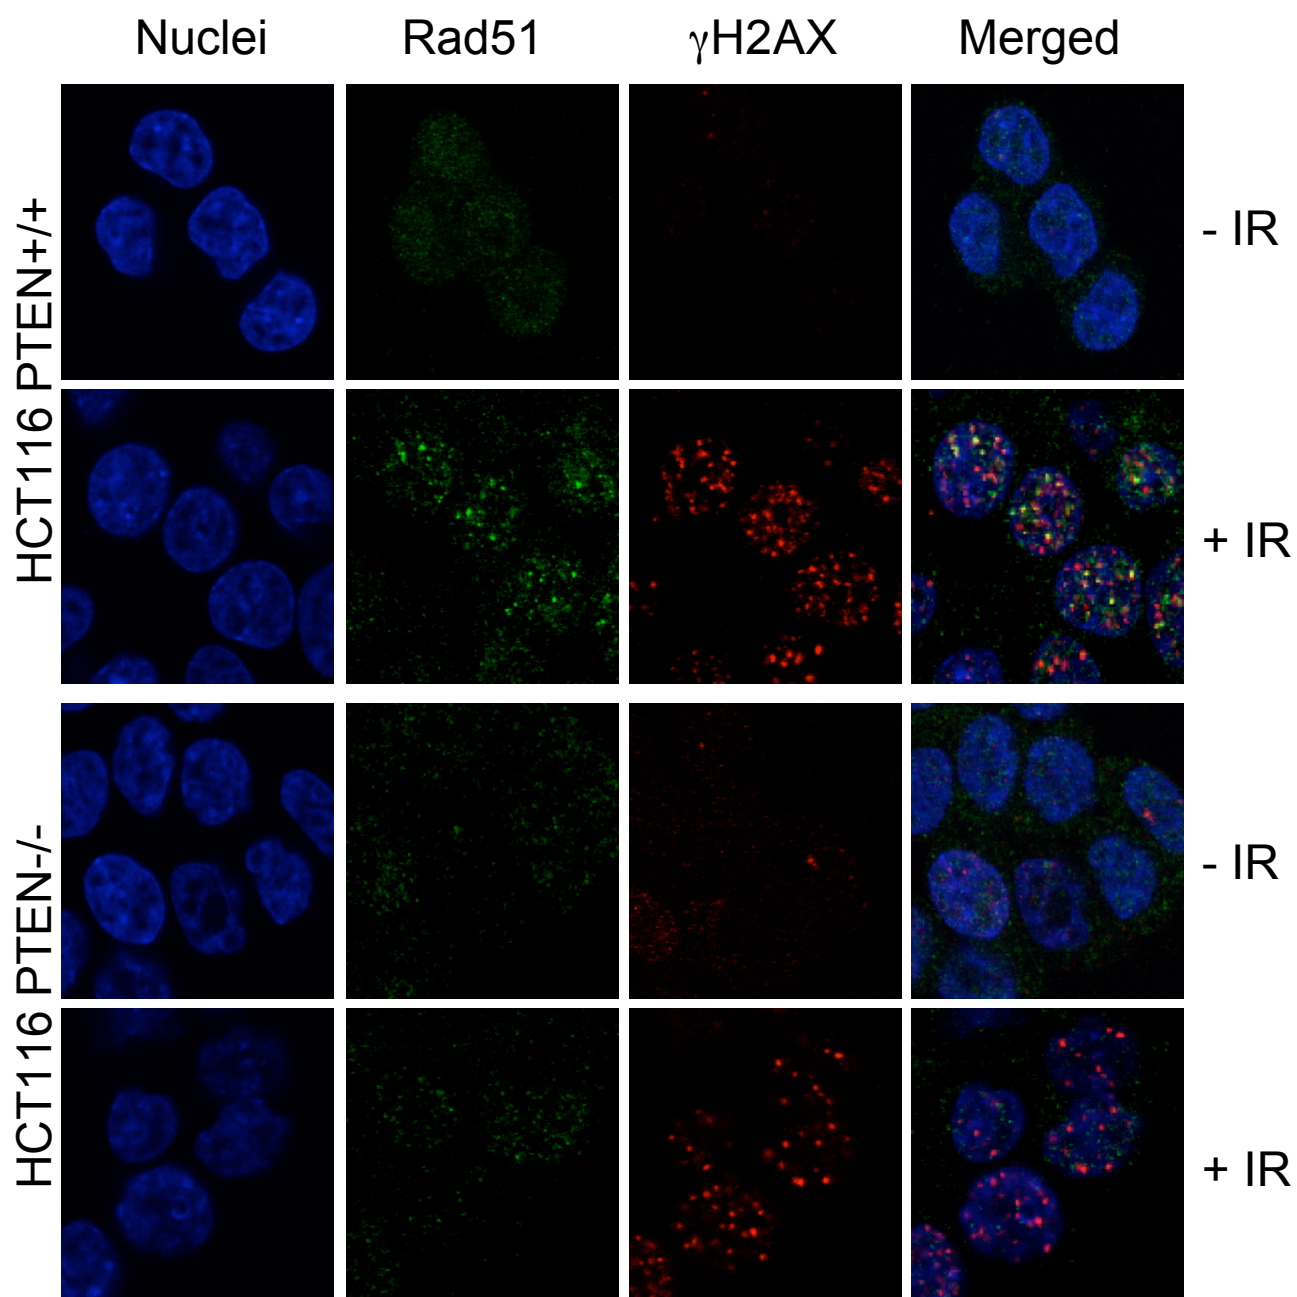

Supplementary  
Figure 3

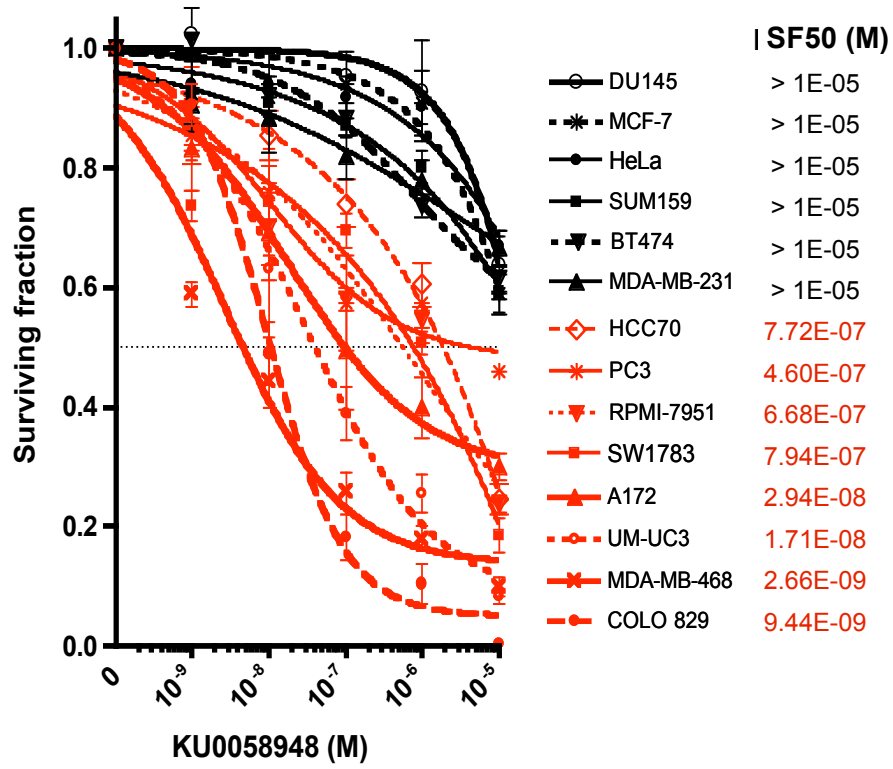

Supplementary  
Figure 4

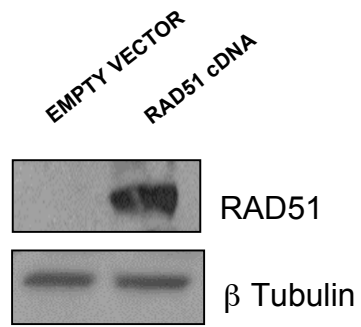



| Sample Name | COSMIC Sample ID | Amino Acid   | Nucleotide        | Primary Tissue         | Histology | Pubmed ID | Mutation ID | Sample Source           |
|-------------|------------------|--------------|-------------------|------------------------|-----------|-----------|-------------|-------------------------|
| HCC70       | 907048           | p.F90fs*9    | c.270delT         | breast                 | carcinoma |           | 5839        | cell-line               |
| S73189      | 850765           | p.K60fs*9    | c.180_181ins?     | breast                 | carcinoma | 9090379   | 5956        | NS                      |
| MDA-MB-468  | 850823           | p.L70fs*7    | c.208_251del44    | breast                 | carcinoma | 9072974   | 4940        | NS                      |
| 895812      | 895812           | p.A39fs*5    | c.116_117insG     | central_nervous_system | glioma    | 15517868  | 6230        | surgery<br>fresh/frozen |
| S69959      | 849640           | p.A79fs*20   | c.237delC         | central_nervous_system | glioma    | 10560660  | 5837        | primary                 |
| SKMG-3      | 847808           | p.C71fs*6    | c.212_255del44    | central_nervous_system | glioma    | 11515790  | 4919        | NS                      |
| S72911      | 850499           | p.D24fs*20   | c.70_71insA       | central_nervous_system | glioma    | 9490783   | 5013        | primary                 |
| S75437      | 851274           | p.D24fs*20   | c.70_71insA       | central_nervous_system | glioma    | 9393744   | 5013        | primary                 |
| S64444      | 845068           | p.E43fs*11   | c.127delG         | central_nervous_system | glioma    | 9499454   | 5807        | NS                      |
| S70838      | 850036           | p.F56fs*2    | c.165_492del328   | central_nervous_system | glioma    | 10980610  | 5872        | primary<br>surgery      |
| 895809      | 895809           | p.K60*       | c.178A>T          | central_nervous_system | glioma    | 15517868  | 6229        | fresh/frozen            |
| S75626      | 851448           | p.K66fs*38   | c.197_198ins14    | central_nervous_system | glioma    | 9619835   | 5022        | primary                 |
| S69259      | 849020           | p.K6fs*4     | c.17_18delAA      | central_nervous_system | glioma    | 11438483  | 4929        | primary                 |
| S62854      | 844241           | p.L70fs*7    | c.210_253del44    | central_nervous_system | glioma    | 9426052   | 4887        | primary                 |
| S62857      | 844244           | p.L70fs*7    | c.210_253del44    | central_nervous_system | glioma    | 9426052   | 4887        | primary                 |
| SF539       | 905984           | p.M1_*404del | c.1_1212del1212   | central_nervous_system | glioma    |           | 14078       | cell-line               |
| H4          | 907042           | p.M1_*404del | c.1_1212del1212   | central_nervous_system | glioma    |           | 14078       | cell-line               |
| D-          |                  |              |                   |                        |           |           |             |                         |
| 245MG       | 946366           | p.M1_*404del | c.1_1212del1212   | central_nervous_system | glioma    |           | 14078       | cell-line               |
| D-          |                  |              |                   |                        |           |           |             |                         |
| 336MG       | 946369           | p.M1_*404del | c.1_1212del1212   | central_nervous_system | glioma    |           | 14078       | cell-line               |
| S69935      | 849616           | p.N12fs*6    | c.35_53del19      | central_nervous_system | glioma    | 10560660  | 4930        | primary                 |
| S68135      | 848253           | p.R14fs*26   | c.42_52del11      | central_nervous_system | glioma    | 12112531  | 4921        | primary                 |
| S73281      | 850849           | p.R15fs*9    | c.45_46insGA      | central_nervous_system | glioma    | 9072974   | 5014        | primary                 |
| A172        | 687563           | p.R55fs*1    | c.165_1212del1048 | central_nervous_system | glioma    |           | 26622       | cell-line               |
| SW1088      | 909745           | p.R55fs*1    | c.165_1212del1048 | central_nervous_system | glioma    |           | 26622       | cell-line               |
| U-87-       |                  |              |                   |                        |           |           |             |                         |
| MG          | 850822           | p.V54fs*29   | c.160_208del49    | central_nervous_system | glioma    | 9072974   | 4939        | NS                      |
| S64442      | 845066           | p.Y16fs*1    | c.47_48insA       | central_nervous_system | glioma    | 9499454   | 5879        | NS                      |
| S67801      | 847927           | p.Y46*       | c.138C>G          | central_nervous_system | glioma    | 11939587  | 5307        | primary                 |

|         |         |            |                  |                        |           |          |       |                       |
|---------|---------|------------|------------------|------------------------|-----------|----------|-------|-----------------------|
| S65197  | 845784  | p.Y65*     | c.195C>A         | central_nervous_system | glioma    | 10096247 | 5296  | primary               |
| S69951  | 849632  | p.Y65*     | c.195C>G         | central_nervous_system | glioma    | 10560660 | 5317  | primary               |
| S69958  | 849639  | p.Y76fs*1  | c.226_227delTA   | central_nervous_system | glioma    | 10560660 | 4963  | primary               |
| S62656  | 844061  | p.Y76fs*1  | c.227_228delAT   | central_nervous_system | glioma    | 9331071  | 4956  | primary               |
| S68139  | 848257  | p.Y76fs*1  | c.227_228delAT   | central_nervous_system | glioma    | 12112531 | 4956  | primary               |
| S70960  | 850147  | p.Y88fs*3  | c.263_264delAT   | central_nervous_system | glioma    | 9681833  | 4934  | primary               |
| LS971   | 945577  | p.Y88fs*3  | c.263_264delAT   | central_nervous_system | glioma    | 10949938 | 4934  | NS                    |
| S67198  | 847435  | p.A3fs*14  | c.9_30del22      | endometrium            | carcinoma | 11585417 | 4923  | primary               |
| S65694  | 846198  | p.C71fs*6  | c.213_256del44   | endometrium            | carcinoma | 10657903 | 4905  | primary               |
| S62930  | 844310  | p.D24fs*19 | c.71_72insC      | endometrium            | carcinoma | 9887237  | 5880  | primary               |
| S67536  | 847693  | p.D24fs*19 | c.71_72insC      | endometrium            | carcinoma | 11006040 | 5880  | primary               |
| S63111  | 844441  | p.E18fs*5  | c.54_57delGGAT   | endometrium            | carcinoma | 9865913  | 4891  | primary<br>surgery    |
| 1048066 | 1048066 | p.E73fs*25 | c.219_222delAAGA | endometrium            | carcinoma | 17219201 | 23629 | fresh/frozen          |
| S75526  | 851354  | p.E73fs*4  | c.219_220delAA   | endometrium            | carcinoma | 9307275  | 4948  | primary<br>surgery -  |
| 1009661 | 1009661 | p.E7fs*3   | c.19_20delGA     | endometrium            | carcinoma | 16021566 | 21341 | NOS<br>surgery        |
| 1048053 | 1048053 | p.F56C     | c.167T>G         | endometrium            | carcinoma | 17219201 | 23624 | fresh/frozen          |
| S75519  | 851347  | p.F90fs*9  | c.270delT        | endometrium            | carcinoma | 9307275  | 5839  | primary               |
| S68847  | 848789  | p.H64fs*9  | c.190_191delCA   | endometrium            | carcinoma | 11555573 | 4928  | primary               |
| S63113  | 844443  | p.I32fs*22 | c.96delT         | endometrium            | carcinoma | 9865913  | 5800  | primary               |
| S66112  | 846569  | p.I32fs*22 | c.96delT         | endometrium            | carcinoma | 9326929  | 5800  | primary               |
| S63114  | 844444  | p.I33fs*20 | c.97_100delATTG  | endometrium            | carcinoma | 9865913  | 4893  | primary               |
| S63078  | 844426  | p.I33fs*21 | c.97delA         | endometrium            | carcinoma | 9829719  | 5798  | primary               |
| S63079  | 844427  | p.I33fs*21 | c.97delA         | endometrium            | carcinoma | 9829719  | 5798  | metastasis<br>surgery |
| E15857  | 738849  | p.K6fs*4   | c.17_18delAA     | endometrium            | carcinoma | 12015762 | 4929  | fresh/frozen          |
| S73358  | 850914  | p.K6fs*4   | c.17_18delAA     | endometrium            | carcinoma | 11849740 | 4929  | primary<br>surgery    |
| 1048051 | 1048051 | p.K6fs*4   | c.17_18delAA     | endometrium            | carcinoma | 17219201 | 4929  | fresh/frozen          |
| S67196  | 847433  | p.L25fs*28 | c.75_78delGACC   | endometrium            | carcinoma | 11585417 | 4922  | primary<br>surgery -  |
| 1009628 | 1009628 | p.L57fs*42 | c.166_166delT    | endometrium            | carcinoma | 16021566 | 21340 | NOS<br>surgery        |
| E15818  | 738809  | p.L57fs*6  | c.170_171insT    | endometrium            | carcinoma | 12015762 | 5000  | fresh/frozen          |

|         |         |              |                  |                                    |                         |          |       |                         |
|---------|---------|--------------|------------------|------------------------------------|-------------------------|----------|-------|-------------------------|
| S68845  | 848787  | p.L57fs*6    | c.170_171insT    | endometrium                        | carcinoma               | 11555573 | 5000  | primary                 |
| 1121036 | 1121036 | p.L57fs*6    | c.170_171insT    | endometrium                        | carcinoma               | 18500270 | 5000  | fixed - NOS             |
| S73359  | 850915  | p.N48fs*6    | c.143delA        | endometrium                        | carcinoma               | 11849740 | 5834  | primary                 |
| S73362  | 850918  | p.N63fs*10   | c.187_188delAA   | endometrium                        | carcinoma               | 11849740 | 4942  | primary<br>surgery      |
| 1048052 | 1048052 | p.N63fs*10   | c.187_188delAA   | endometrium                        | carcinoma               | 17219201 | 4942  | fresh/frozen<br>surgery |
| 1048067 | 1048067 | p.N63fs*10   | c.187_188delAA   | endometrium                        | carcinoma               | 17219201 | 4942  | fresh/frozen            |
| S73361  | 850917  | p.N63fs*11   | c.188_189insA    | endometrium                        | carcinoma               | 11849740 | 5017  | primary                 |
| S87002  | 852673  | p.N63fs*36   | c.187delA        | endometrium                        | carcinoma               | 9354433  | 5836  | primary                 |
| S65506  | 846031  | p.N63fs*36   | c.188delA        | endometrium                        | carcinoma               | 10746673 | 5811  | primary                 |
| S75527  | 851355  | p.N63fs*36   | c.188delA        | endometrium                        | carcinoma               | 9307275  | 5811  | primary                 |
| S65507  | 846032  | p.N63fs*36   | c.188delA        | endometrium                        | hyperplasia             | 10746673 | 5811  | primary                 |
| S65683  | 846187  | p.N69fs*30   | c.206delA        | endometrium                        | carcinoma               | 10657903 | 5818  | primary                 |
| S63112  | 844442  | p.P30fs*24   | c.89delC         | endometrium                        | carcinoma               | 9865913  | 5799  | primary                 |
| S86998  | 852669  | p.R14fs*10   | c.40delA         | endometrium                        | carcinoma               | 9354433  | 5831  | primary                 |
| S65503  | 846028  | p.R14fs*29   | c.41_42insG      | endometrium                        | carcinoma               | 10746673 | 5877  | primary                 |
| S67062  | 847299  | p.R15fs*28   | c.45_46insT      | endometrium                        | carcinoma               | 11190805 | 5020  | primary                 |
| S68836  | 848778  | p.R55fs*2    | c.165_181del17   | endometrium                        | carcinoma               | 11555573 | 4926  | primary                 |
| S67546  | 847703  | p.T26fs*28   | c.78delC         | endometrium                        | carcinoma               | 11006040 | 5833  | primary                 |
| S73360  | 850916  | p.V45fs*10   | c.134_135insCA   | endometrium                        | carcinoma               | 11849740 | 5016  | primary                 |
| S67493  | 847650  | p.Y16fs*21   | c.46_65del20     | endometrium                        | carcinoma               | 11006040 | 4914  | primary                 |
| S82126  | 852119  | p.Y16fs*28   | c.46_47insT      | endometrium                        | carcinoma               | 15069681 | 5878  | primary                 |
| S77674  | 851776  | p.Y27fs*1    | c.80_90del11     | endometrium                        | carcinoma               | 11156411 | 4964  | primary                 |
| S86999  | 852670  | p.Y27fs*16   | c.80_81delAT     | endometrium                        | carcinoma               | 9354433  | 4952  | primary<br>surgery      |
| 1048065 | 1048065 | p.Y29fs*25   | c.83_83delT      | endometrium                        | carcinoma               | 17219201 | 23628 | fresh/frozen            |
| S63056  | 844404  | p.Y68fs*5    | c.202_203delTA   | endometrium                        | carcinoma               | 9829719  | 4889  | primary                 |
| S62932  | 844312  | p.Y76fs*1    | c.227_228delAT   | endometrium                        | carcinoma               | 9887237  | 4956  | primary                 |
| S63078  | 844426  | p.Y76fs*1    | c.227_228delAT   | endometrium                        | carcinoma               | 9829719  | 4956  | primary                 |
| OPM-2   | 909249  | p.M1_*404del | c.1_1212del11212 | haematopoietic_and_lymphoid_tissue | haematopoietic_neoplasm |          | 14078 | cell-line               |
| S70738  | 849939  | p.M1fs*7     | c.1_8delATGACAGC | haematopoietic_and_lymphoid_tissue | lymphoid_neoplasm       | 9697884  | 5982  | primary                 |
| KE-37   | 907277  | p.Y27fs*1    | c.80_1212del1133 | haematopoietic_and_lymphoid_tissue | haematopoietic_neoplasm |          | 26623 | cell-line               |
| 1141    | 1141074 | p.E7fs*3     | c.21_22delGA     | large_intestine                    | carcinoma               | 18781614 | 27631 | surgery                 |



|                                   |         |              |                                |                 |            |          |       |  |                                 |
|-----------------------------------|---------|--------------|--------------------------------|-----------------|------------|----------|-------|--|---------------------------------|
|                                   |         |              |                                |                 |            |          |       |  | fresh/frozen                    |
| 980                               | 1141072 | p.F90fs*9    | c.270delT                      | large_intestine | carcinoma  | 18781614 | 5839  |  | surgery<br>fresh/frozen         |
| 1141                              | 1141074 | p.L57fs*42   | c.170delT                      | large_intestine | carcinoma  | 18781614 | 5835  |  | surgery<br>fresh/frozen         |
| 1190                              | 1141075 | p.L57fs*6    | c.170_171insT                  | large_intestine | carcinoma  | 18781614 | 5000  |  | surgery<br>fresh/frozen         |
| S66226                            | 846674  | p.C83fs*9    | c.247_248insT                  | liver           | carcinoma  | 10363579 | 5883  |  | primary                         |
| H774<br>NCI-                      | 844562  | p.?          | c.1-?_492+?del                 | lung            | carcinoma  | 9696041  | 5779  |  | NS                              |
| H774                              | 844809  | p.?          | c.1-?_492+?del                 | lung            | carcinoma  | 9598803  | 5779  |  | NS                              |
| SBC-1<br>NCI-                     | 713885  | p.M1_*404del | c.1_1212del1212                | lung            | carcinoma  |          | 14078 |  | cell-line                       |
| H774                              | 924243  | p.M1_*404del | c.1_1212del1212                | lung            | carcinoma  |          | 14078 |  | cell-line                       |
| N230                              | 844810  | p.M1_?del fs | c.1-?_79+?del                  | lung            | carcinoma  | 9598803  | 5783  |  | NS                              |
| N231                              | 844811  | p.M1_?del fs | c.1-?_79+?del                  | lung            | carcinoma  | 9598803  | 5783  |  | NS                              |
| N417<br>NCI-                      | 844812  | p.M1_?del fs | c.1-?_79+?del                  | lung            | carcinoma  | 9598803  | 5783  |  | NS                              |
| H1436<br>LU-134-                  | 908469  | p.R55fs*1    | c.165_1212del1048              | lung            | carcinoma  |          | 26626 |  | cell-line                       |
| A                                 | 753588  | p.Y27fs*1    | c.80_1212del1133               | lung            | carcinoma  |          | 26623 |  | cell-line                       |
| S74259                            | 851158  | p.L57fs*42   | c.170delT                      | meninges        | meningioma | 9549723  | 5835  |  | primary                         |
| 1131708                           | 1131708 | p.C71fs*28   | c.213_213delT                  | ovary           | carcinoma  | 17418409 | 27933 |  | fresh - NOS<br>surgery -<br>NOS |
| 979747                            | 979747  | p.F81fs*18   | c.241_242TT>G                  | ovary           | carcinoma  | 15668893 | 21619 |  | cell-line                       |
| RTSG                              | 909705  | p.K6fs*4     | c.17_18delAA                   | ovary           | carcinoma  |          | 4929  |  | cell-line                       |
| S63057                            | 844405  | p.Y68fs*5    | c.202_203delTA                 | ovary           | carcinoma  | 9829719  | 4889  |  | primary                         |
| S63183                            | 844508  | p.G36fs*18   | c.107delG                      | prostate        | carcinoma  | 9823969  | 5802  |  | primary                         |
| S63185<br>LNCaP-<br>Clone-<br>FGC | 844510  | p.G44fs*11   | c.131_139GCGTATACA>ACAGAAAGACA | prostate        | carcinoma  | 9823969  | 5769  |  | primary                         |
| 907788                            |         | p.K6fs*4     | c.17_18delAA                   | prostate        | carcinoma  |          | 4929  |  | cell-line                       |
| LNCaP                             | 850745  | p.K6fs*4     | c.16_17delAA                   | prostate        | carcinoma  | 9090379  | 4937  |  | NS                              |
| LNCaP                             | 850821  | p.K6fs*4     | c.16_17delAA                   | prostate        | carcinoma  | 9072974  | 4937  |  | NS                              |
| LNCaP                             | 850413  | p.K6fs*4     | c.17_18delAA                   | prostate        | carcinoma  | 9661880  | 4929  |  | NS                              |
| S72826                            | 850417  | p.Q87*       | c.259C>T                       | prostate        | carcinoma  | 9661880  | 5163  |  | NS                              |
| PC-3                              | 905934  | p.R55fs*1    | c.165_1212del1048              | prostate        | carcinoma  |          | 26622 |  | cell-line                       |

|         |        |              |                 |               |                    |          |       |            |
|---------|--------|--------------|-----------------|---------------|--------------------|----------|-------|------------|
| S72835  | 850426 | p.Y76fs*1    | c.226_227delTA  | prostate      | carcinoma          | 9661880  | 4963  | NS         |
| FM95    | 851403 | p.?          | c.1-?_492+?del  | skin          | malignant_melanoma | 9288767  | 5779  | NS         |
| S77773  | 851874 | p.K6fs*4     | c.17_18delAA    | skin          | malignant_melanoma | 10651986 | 4929  | metastasis |
| G-mel   | 706101 | p.M1_?del fs | c.1-?_79+?del   | skin          | malignant_melanoma | 10766161 | 5783  | NS         |
| SW872   | 909756 | p.M1_*404del | c.1_1212del1212 | soft_tissue   | liposarcoma        |          | 14078 | cell-line  |
| UM-UC-3 | 724838 | p.M1_*404del | c.1_1212del1212 | urinary_tract | carcinoma          |          | 14078 | cell-line  |

### **Supplementary Table 1.**

Genotypes of human tumour cell lines used in this study.

### **Supplementary Table 2.**

Human tumours and tumour cell lines listed in the COSMIC database ([www.http://www.sanger.ac.uk/genetics/CGP/cosmic/](http://www.sanger.ac.uk/genetics/CGP/cosmic/)) bearing *PTEN* mutations predicted to truncate the open reading frame before amino acid 93.

### **Supplementary Figure 1. Homologous recombination and PARP inhibitor sensitivity in HEC1A tumour cells.**

**A)** *PTEN* deficiency in HEC1A cells causes a reduction in RAD51 expression. Total cell lysates from isogenic HEC1A endometrial tumour cells were immunoblotted for *PTEN* and RAD51. Detection of ACTIN is shown as a loading control. Parental HEC1A cells are shown (*PTEN*<sup>+/+</sup>) along with two individually derived *PTEN*<sup>-/-</sup> lines (KO16 and KO22). **B)** *PTEN* deficiency in HEC1A cells causes a reduction in IR-induced nuclear RAD51 focus formation. \* *p* values vs. +IR *PTEN*<sup>+/+</sup> < 0.05 (Student's *t* test). No other comparisons were statistically significant. **C)** *PTEN* deficiency in HEC1A cells sensitises cells to a drug-like PARP inhibitor. *p* values for both *PTEN*<sup>-/-</sup> lines vs. *PTEN*<sup>+/+</sup> cells < 0.001 (two-way ANOVA). **D)** *PTEN* deficiency in HEC1A cells causes a reduction in HR using a synthetic HR substrate. \* *p* values null vs. wild type *PTEN* cells < 0.05 (Student's *t* test).

### **Supplementary Figure 2. Decreased RAD51 focus formation upon DNA damage**

**in *PTEN* deficient cells.**  $\gamma$ H2AX foci (red), RAD51 foci (green) and nuclei (stained with DAPI – blue) are shown. Magnification is 1000X.

**Supplementary Figure 3. PARP inhibitor sensitivity in human tumour cells.**

See Supplementary Table 1 for genotypes. PTEN mutant lines are shown in red and PTEN wild type lines in black. For each PTEN null line, survival was significantly different than in DU145 and MCF7 cells ( $p < 0.05$ , two-way ANOVA).

**Supplementary Figure 4. RAD51 expression from a retroviral vector used in**

**Figure 4.** PC3 cells were infected with virus and cell lysates analysed by western blotting two days later.
